# Supplementary material for: A Straightforward Cytometry-Based Protocol for the Comprehensive Analysis of the Inflammatory Valve Infiltrate in Aortic Stenosis
Source: MDPI journal article supplement (doi:10.3390/ijms24032194), 2023-01-22
Supplement: s1 [file s1]

**Table S1. Infiltrating valve cells phenotyping panel**

| ANTIBODY                                            | CLON     | FLUOROCHROME    | SUPPLIER                                 |
|-----------------------------------------------------|----------|-----------------|------------------------------------------|
| CD45                                                | HI30     | Alexa Fluor 700 | BD Becton Dickinson                      |
| CD3                                                 | SK7      | PE-Cy5.5        | Invitrogen                               |
| CD8                                                 | RPA-T8   | V500            | BD Becton Dickinson                      |
| CD4                                                 | SK3      | BB700/BV510     | BD Becton Dickinson                      |
| CD14                                                | TÜK4     | APC             | BD Becton Dickinson                      |
| CD28                                                | CD28.2   | PE-Cy7          | BD Becton Dickinson                      |
| CD16                                                | 3G8      | BV786           | BD Becton Dickinson                      |
| CD56                                                | NCAM16.2 | BV421           | BD Becton Dickinson                      |
| Live/Dead Fixable<br>Near-IR Dead Cell<br>Stain Kit | NA       | Near-IR         | Molecular Probes of<br>Life Technologies |

**Table S2. Infiltrating valve cells phenotyping panel for functional assay**

|         | ANTIBODY                                            | CLON   | FLUOROCHROME    | SUPPLIER                                    |
|---------|-----------------------------------------------------|--------|-----------------|---------------------------------------------|
| Surface | CD45                                                | HI30   | Alexa Fluor 700 | BD Becton<br>Dickinson                      |
|         | Live/Dead Fixable<br>Near-IR Dead Cell<br>Stain Kit | NA     | Near-IR         | Molecular Probes<br>of Life<br>Technologies |
|         | CD8                                                 | RPA-T8 | V500            | BD Becton<br>Dickinson                      |
|         | CD4                                                 | SK3    | BUV395          | BD Becton<br>Dickinson                      |
| ICS     | IFN $\gamma$                                        | 45-15  | FITC            | Miltenyi                                    |
|         | Granzyme B                                          | GB11   | PE              | BD Becton<br>Dickinson                      |
|         | TNF                                                 | MAb11  | BV650           | BD Becton<br>Dickinson                      |
|         | CD3                                                 | SK7    | PE-Cy5.5        | Invitrogen                                  |

**Table S3. Peripheral T blood cells phenotyping panel**

|         | <b>ANTIBODY</b> | <b>CLON</b> | <b>FLUOROCHROME</b> | <b>SUPPLIER</b>     |
|---------|-----------------|-------------|---------------------|---------------------|
| Surface | CD45            | HI30        | Alexa Fluor 700     | BD Becton Dickinson |
|         | CD3             | SK7         | PE-Cy5.5            | Invitrogen          |
|         | CD8             | RPA-T8      | APC-H7              | BD Becton Dickinson |
|         | CD4             | SK3         | BB700               | BD Becton Dickinson |
|         | CD56            | NCAM16.2    | BV421               | BD Becton Dickinson |
|         | CD28            | CD28.2      | PE-Cy7              | BD Becton Dickinson |

**Table S4. Peripheral innate blood cells phenotyping panel**

|         | <b>ANTIBODY</b> | <b>CLON</b> | <b>FLUOROCHROME</b> | <b>SUPPLIER</b>     |
|---------|-----------------|-------------|---------------------|---------------------|
| Surface | CD45            | HI30        | Alexa Fluor 700     | BD Becton Dickinson |
|         | CD3             | SK7         | PE-Cy5.5            | Invitrogen          |
|         | CD56            | NCAM16.2    | BV421               | BD Becton Dickinson |
|         | CD19            | SJ25C1      | BV650               | BD Becton Dickinson |
|         | CD7             | M-T701      | APC                 | BD Becton Dickinson |
|         | CD16            | 3G8         | BV786               | BD Becton Dickinson |
|         | CD14            | TÜK4        | APC Vio770          | BD Becton Dickinson |

**Table S5. Mean and standard deviation of frequencies of innate and adaptative leukocyte subpopulations and phenotypes.**

|                   |            |          | Valve         | PB            |
|-------------------|------------|----------|---------------|---------------|
|                   |            |          | Mean ± SD     |               |
| Neutrophils CD16+ |            |          | 7,76 ± 7,11   | 57,84 ± 17,87 |
| Monocytes         |            |          | 16,03 ± 6,83  | 4,83 ± 3,68   |
| NK cells          |            |          | 5,18 ± 3,06   | 3,54 ± 2,65   |
|                   | CD56bright |          | 29,75 ± 15,57 | 7,38 ± 5,44   |
|                   | CD56dim    |          | 15,06 ± 10,52 | 83,46 ± 9,13  |
|                   | CD56–CD16+ |          | 4,99 ± 5,84   | 5,93 ± 5,91   |
| T cells           |            |          | 48,09 ± 10,26 | 20,47 ± 10,22 |
|                   | CD4        |          | 56,38 ± 10,39 | 61,23 ± 14,77 |
|                   |            | CD56     | 7,65 ± 7,51   | 2,53 ± 4,51   |
|                   |            | CD28null | 27,73 ± 14,45 | 11,77 ± 16,63 |
|                   |            | CD28     | 82,27 ± 14,45 | 88,23 ± 16,63 |
|                   | CD8        |          | 39,21 ± 10,01 | 34,24 ± 14,77 |
|                   |            | CD56     | 14,88 ± 9,11  | 22,59 ± 14,61 |
|                   |            | CD28null | 59,74 ± 14,94 | 58,66 ± 22,57 |
|                   |            | CD28     | 41,26 ± 14,94 | 41,34 ± 22,57 |
|                   | DN         |          | 2,86 ± 1,75   | 3,99 ± 3,62   |
|                   |            | CD56     | 17,53 ± 9,95  | 40,74 ± 18,51 |
|                   |            | CD28null | 61,46 ± 17,58 | 65,54 ± 21,25 |
|                   |            | CD28     | 39,54 ± 17,58 | 34,46 ± 21,25 |
|                   | DP         |          | 1,07 ± 1,7    | 0,54 ± 0,43   |

\*Frequencies of neutrophils, monocytes, NK cells, and T cells were calculated from the total of leukocytes. Frequencies of NK and T cell subsets and their phenotypical markers were calculated from the parent population.

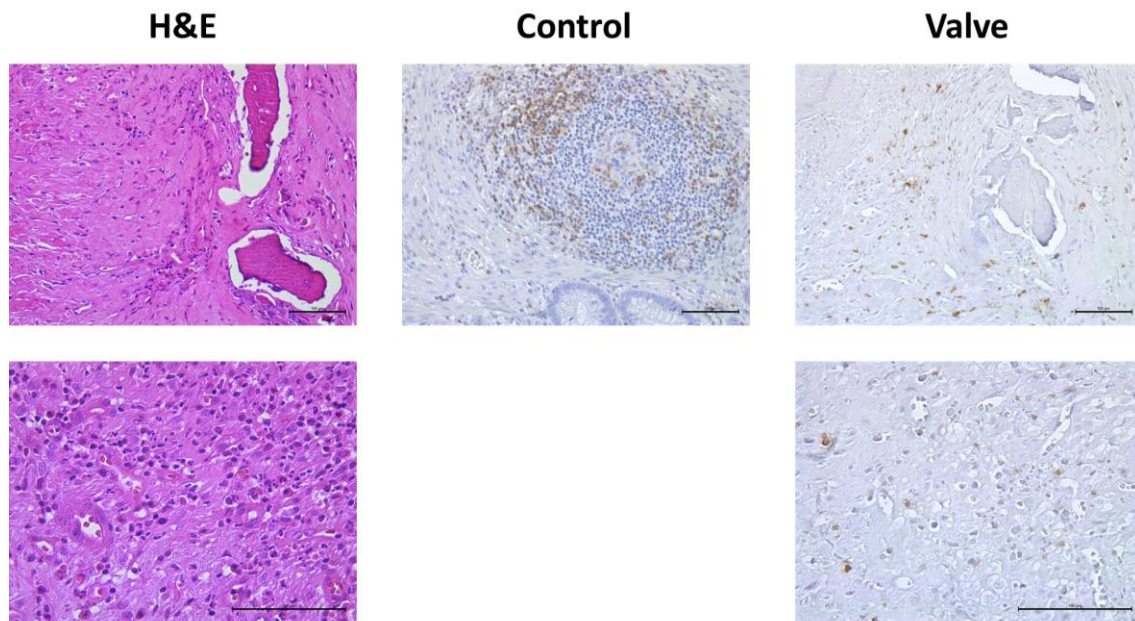

**Figure S1. Immunohistochemical analysis of aortic stenosis valve sections.** Aortic valve sections were stained using haematoxylin-eosin (H&E) and anti-CD3 (Valve). CD3+ cells were represented with yellow colour. Human lymph node stained with anti-CD3 was used as positive control.

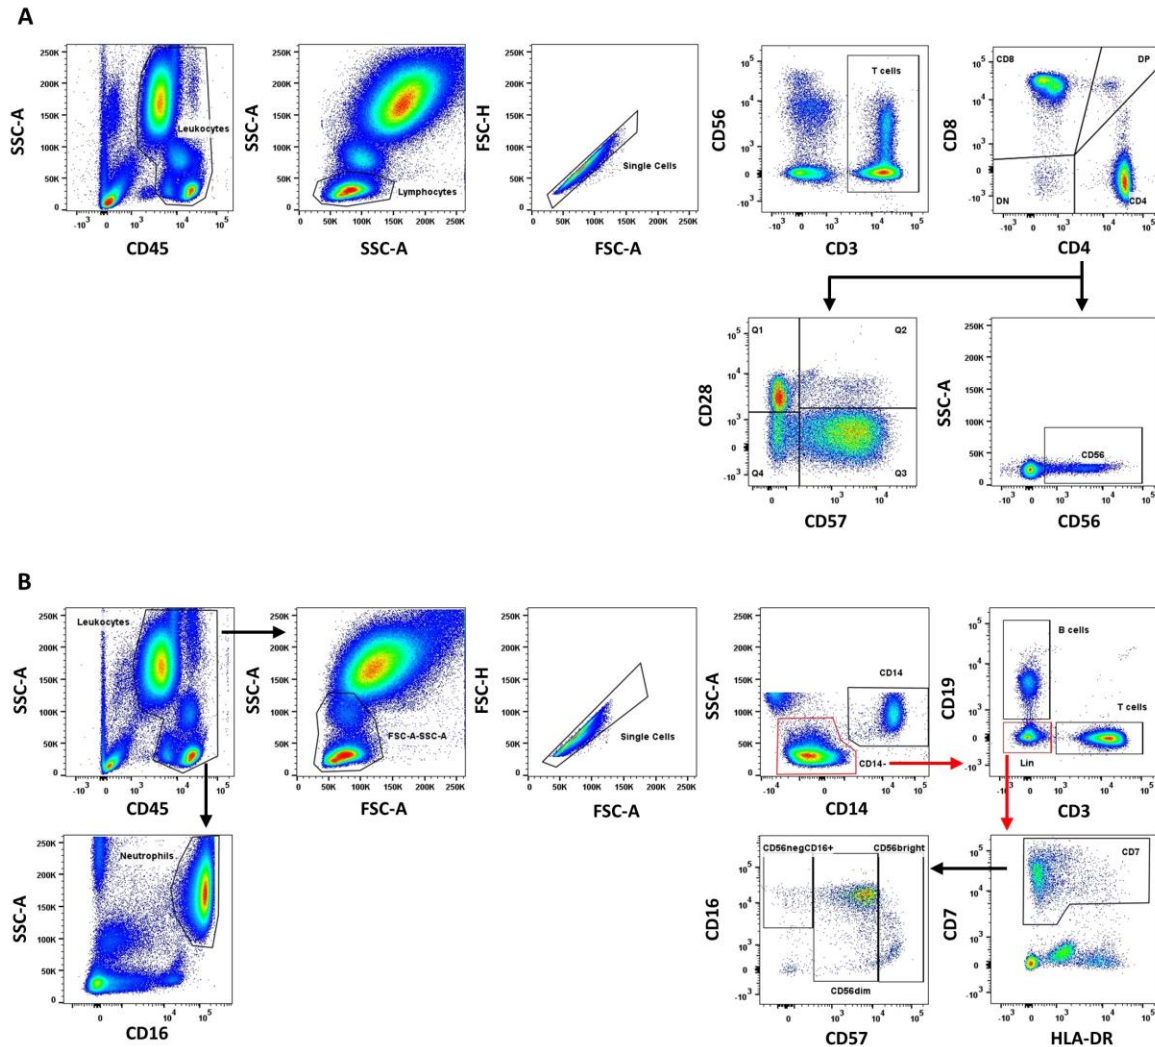

**Figure S2. Gating strategy for the characterization of peripheral blood immune cells.** The leukocyte gate was created in an SSC-A/CD45 plot. **(A)** Gating strategy for T blood cell characterisation. After the Leukocytes gate, lymphocytes were gated in an SSC-A/FSC-A plot. Doublets were excluded using an FSC-A/FSC-H plot. From this gate, T cells were gated confronting CD56 and CD3 markers. T cell subsets were defined in a CD8/CD4 plot. From each T cell subpopulation, CD56 was single-gated, and CD28 and CD57 markers were determined using a quad. **(B)** Gating strategy for innate blood cell characterisation. From the Leukocytes gate, the neutrophils gate was created in an SSC-A/CD16 plot. For the rest of the innate populations, monocytes and lymphocytes region were gated in an SSC-A/FSC-A plot. Doublets were excluded using an FSC-A/FSC-H plot. Monocytes (CD14) were gated in an SSC-A/CD14 plot. From cells without CD14 expression (CD14-), we excluded T and B cells in a CD3/CD19 plot. Then, we gated NK cells in a CD7/HLA-DR plot. Finally, NK cell phenotype was determined in a CD56/CD16 plot by CD56 fluorescence intensity and expression of the CD16 marker.

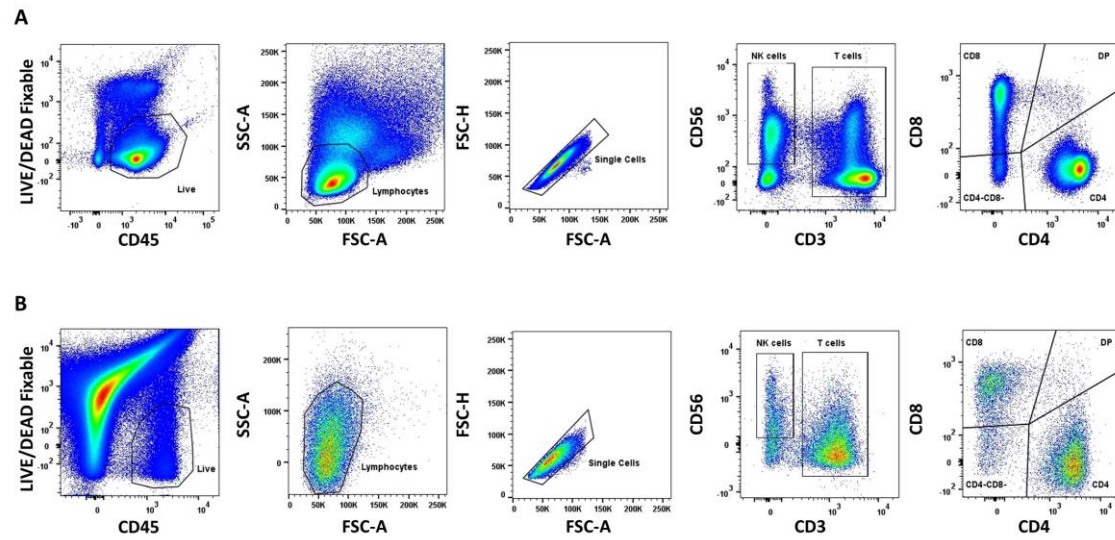

**Figure S3. Gating strategy for functional assay. (A)** Gating strategy for peripheral blood mononuclear cells (PBMCs) functional assay. **(B)** Gating strategy for valvular infiltrating cells. Living leukocyte gate was created in a Live-Dead Fixable/CD45 plot. Lymphocytes gate was created in an SSC-A/FSC-A plot. Then, doublets were excluded in an FSC-H/FSC-A plot. From the singlets gate, T cells and NK cells were gated in a CD56/CD3 plot. Finally, T cell subsets were determined in a CD8/CD4 plot using a quad.
